# Supplementary material for: Effects of Probiotics and Synbiotics on Weight Loss in Subjects with Overweight or Obesity: A Systematic Review
Source: MDPI journal article supplement (doi:10.3390/nu13103627), 2021-10-17
Supplement: s1 [file s1]

## Supplementary Material:

**Table S1.** Search strategies used for this systematic review.

| Search strategy                                                                                                                                                                                                                       | Search filters                                                                        | Articles found |
|---------------------------------------------------------------------------------------------------------------------------------------------------------------------------------------------------------------------------------------|---------------------------------------------------------------------------------------|----------------|
| Pubmed                                                                                                                                                                                                                                |                                                                                       |                |
| ((probiotics [MeSH terms])<br>OR (Lactoba-<br>cillus [MeSH terms]) OR<br>(Synbiotics [MeSH terms] ))<br>AND ((overweight [MeSH<br>Terms]) OR (obesity [MeSH<br>Terms]) OR (Weight Loss<br>[MeSH Terms]))                              | Published in the last<br>10 years<br>Article Type: Clinical Trials<br>Species: Humans | 101            |
| Scopus                                                                                                                                                                                                                                |                                                                                       |                |
| TITLE-ABS (probiotic* OR<br>prebiotic* OR synbiotic*<br>OR lactobacillus OR<br>bifidobacteria) AND<br>TITLE-ABS ( overweight<br>OR obesity OR "weight<br>loss") AND NOT mice                                                          | Published in the last 10 years<br>Document type: Article                              | 47             |
| Web of Science                                                                                                                                                                                                                        |                                                                                       |                |
| (TS=(probiotic* OR prebiotic*<br>OR synbiotic* OR<br>lactobacillus OR<br>bifidobacteria) AND<br>TS=(overweight OR obesity<br>OR "weight loss") AND TI=<br>(trial) NOT TS= (mice OR<br>mouse OR rat OR animal*)<br>AND PY=(2011-2021)) | Field Tags: TS                                                                        | 56             |

ABS: Abstract; TS: Topic; TI: Title

**Table S2.** Assessment of the methodological quality of the included clinical trials, using the Jadad scale.

| Author [ref]                  | Is the item described randomized? (*) | Is the study described as double blind? (*) | Are dropouts & exclusions from that study described? (*) | Is the method of randomization appropriate? (**) | Is the double blind method appropriate? (**) | Final score |
|-------------------------------|---------------------------------------|---------------------------------------------|----------------------------------------------------------|--------------------------------------------------|----------------------------------------------|-------------|
| Gomes et al. [35]             | 1                                     | 1                                           | 1                                                        | 1                                                | 1                                            | 5           |
| Gutiérrez-Repiso et al. [42]  | 1                                     | 0                                           | 1                                                        | 1                                                | -1                                           | 2           |
| Hadi et al. [41]              | 1                                     | 1                                           | 1                                                        | 1                                                | 1                                            | 5           |
| Higashikawa et al. [34]       | 1                                     | 1                                           | 1                                                        | 1                                                | 1                                            | 5           |
| Ipar et al. [31]              | 1                                     | 0                                           | 1                                                        | -1                                               | -1                                           | 0           |
| Jung et al. [30]              | 1                                     | 1                                           | 1                                                        | 1                                                | 1                                            | 5           |
| Kadooka et al. [27]           | 1                                     | 1                                           | 0                                                        | 1                                                | 1                                            | 4           |
| Kadooka et al. [23]           | 1                                     | 1                                           | 0                                                        | 1                                                | 1                                            | 4           |
| Kianifar et al. [37]          | 1                                     | 1                                           | 1                                                        | -1                                               | -1                                           | 1           |
| Kim et al. [38]               | 1                                     | 1                                           | 1                                                        | 1                                                | 1                                            | 5           |
| Lee et al. [29]               | 1                                     | 1                                           | 1                                                        | -1                                               | 1                                            | 4           |
| Lim et al. [46]               | 1                                     | 1                                           | 1                                                        | -1                                               | -1                                           | 1           |
| Madjd et al. [33]             | 1                                     | 0                                           | 1                                                        | -1                                               | -1                                           | 0           |
| Michael et al. [43]           | 1                                     | 1                                           | 1                                                        | 1                                                | 1                                            | 5           |
| Michael et al. [48]           | 1                                     | 1                                           | 1                                                        | 1                                                | 1                                            | 5           |
| Mohammadi-Sartang et al. [36] | 1                                     | 1                                           | 1                                                        | -1                                               | 1                                            | 3           |
| Omar et al. [24]              | 0                                     | 1                                           | 0                                                        | 1                                                | 1                                            | 3           |
| Pedret et al. [39]            | 1                                     | 1                                           | 1                                                        | 1                                                | 1                                            | 5           |
| Rahayu et al. [49]            | 1                                     | 1                                           | 1                                                        | 1                                                | 1                                            | 5           |
| Razmpoosh et al. [44]         | 1                                     | 0                                           | 1                                                        | 1                                                | -1                                           | 2           |
| Safavi et al. [26]            | 1                                     | 1                                           | 1                                                        | -1                                               | 1                                            | 3           |
| Sanchez et al. [25]           | 1                                     | 1                                           | 1                                                        | 1                                                | 1                                            | 5           |
| Sergeev et al. [47]           | 0                                     | 0                                           | 0                                                        | -1                                               | -1                                           | -2          |
| Song et al. [45]              | 1                                     | 1                                           | 1                                                        | 1                                                | 1                                            | 5           |
| Stenman et al. [32]           | 1                                     | 1                                           | 1                                                        | 1                                                | 1                                            | 5           |
| Sudha et al. [40]             | 1                                     | 1                                           | 1                                                        | 1                                                | 1                                            | 5           |
| Zarrati et al. [28]           | 1                                     | 1                                           | 0                                                        | 1                                                | 1                                            | 4           |

(\*) Yes = 1 / No = 0

(\*\*) Yes = 1 / No = -1.
